# Supplementary material for: A cross-sectional study of the nasal and fecal microbiota of sows from different health status within six commercial swine farms
Source: PeerJ. 2021 Sep 17;9:e12120. doi: 10.7717/peerj.12120 (PMC8451438; doi:10.7717/peerj.12120)
Supplement: Supplemental Information 1 [file peerj-09-12120-s001.xlsx]

## Sheet: Sheet1
Supplemental Table 1: Number of reads in each sample. (Chloroplasts, mitochondria, and eukaryotic reads have been removed.)
Sample ID	Status	SampleType	Farm	Reads
802.247	Cull	Nasal swab	Farm 1	1054
802.248	Cull	Nasal swab	Farm 1	159*
802.249	Healthy	Nasal swab	Farm 1	129*
802.250	Healthy	Nasal swab	Farm 1	1484
802.251	Clinical	Nasal swab	Farm 1	5321
802.252	Clinical	Nasal swab	Farm 1	27870
802.253	Cull	Nasal swab	Farm 2	4879
802.254	Cull	Nasal swab	Farm 2	1824
802.255	Healthy	Nasal swab	Farm 2	46*
802.256	Healthy	Nasal swab	Farm 2	3*
802.257	Clinical	Nasal swab	Farm 2	1*
802.258	Clinical	Nasal swab	Farm 2	25*
802.259	Cull	Nasal swab	Farm 3	56*
802.260	Cull	Nasal swab	Farm 3	38*
802.261	Healthy	Nasal swab	Farm 3	41*
802.262	Healthy	Nasal swab	Farm 3	22*
802.263	Clinical	Nasal swab	Farm 3	6886
802.264	Clinical	Nasal swab	Farm 3	9199
802.265	Cull	Nasal swab	Farm 4	173*
802.266	Cull	Nasal swab	Farm 4	1624
802.267	Healthy	Nasal swab	Farm 4	9659
802.268	Healthy	Nasal swab	Farm 4	67*
802.269	Clinical	Nasal swab	Farm 4	4206
802.270	Clinical	Nasal swab	Farm 4	2414
802.271	Cull	Nasal swab	Farm 5	3470
802.272	Cull	Nasal swab	Farm 5	117*
802.273	Healthy	Nasal swab	Farm 5	16*
802.274	Healthy	Nasal swab	Farm 5	1449
802.275	Clinical	Nasal swab	Farm 5	775
802.276	Clinical	Nasal swab	Farm 5	26*
802.277	Cull	Nasal swab	Farm 6	416*
802.278	Cull	Nasal swab	Farm 6	3187
802.279	Healthy	Nasal swab	Farm 6	1486
802.280	Healthy	Nasal swab	Farm 6	2387
802.281	Clinical	Nasal swab	Farm 6	86*
802.282	Clinical	Nasal swab	Farm 6	2003
802.283	Cull	Fecal swab	Farm 1	27194
802.284	Cull	Fecal swab	Farm 1	12698
802.285	Healthy	Fecal swab	Farm 1	20600
802.286	Healthy	Fecal swab	Farm 1	41573
802.287	Clinical	Fecal swab	Farm 1	28170
802.288	Clinical	Fecal swab	Farm 1	23306
802.289	Cull	Fecal swab	Farm 2	5694
802.290	Cull	Fecal swab	Farm 2	23419
802.291	Healthy	Fecal swab	Farm 2	27946
802.292	Healthy	Fecal swab	Farm 2	20354
802.293	Clinical	Fecal swab	Farm 2	20387
802.294	Clinical	Fecal swab	Farm 2	37356
802.295	Cull	Fecal swab	Farm 3	20365
802.296	Cull	Fecal swab	Farm 3	18131
802.297	Healthy	Fecal swab	Farm 3	13059
802.298	Healthy	Fecal swab	Farm 3	21207
802.299	Clinical	Fecal swab	Farm 3	20769
802.300	Clinical	Fecal swab	Farm 3	18953
802.301	Cull	Fecal swab	Farm 4	27058
802.302	Cull	Fecal swab	Farm 4	28606
802.303	Healthy	Fecal swab	Farm 4	34385
802.304	Healthy	Fecal swab	Farm 4	14527
802.305	Clinical	Fecal swab	Farm 4	9097
802.306	Clinical	Fecal swab	Farm 4	17450
802.307	Cull	Fecal swab	Farm 5	30742
802.308	Cull	Fecal swab	Farm 5	19770
802.309	Healthy	Fecal swab	Farm 5	12950
802.310	Healthy	Fecal swab	Farm 5	30939
802.311	Clinical	Fecal swab	Farm 5	14213
802.312	Clinical	Fecal swab	Farm 5	28828
802.313	Cull	Fecal swab	Farm 6	7183
802.314	Cull	Fecal swab	Farm 6	43206
802.315	Healthy	Fecal swab	Farm 6	32341
802.316	Healthy	Fecal swab	Farm 6	37836
802.317	Clinical	Fecal swab	Farm 6	48451
802.318	Clinical	Fecal swab	Farm 6	62677
*Samples excluded from analyses for having fewer than 500 reads
