# Supplementary material for: A cross-sectional study of the nasal and fecal microbiota of sows from different health status within six commercial swine farms
Source: PeerJ. 2021 Sep 17;9:e12120. doi: 10.7717/peerj.12120 (PMC8451438; doi:10.7717/peerj.12120)
Supplement: Supplemental Information 2 [file peerj-09-12120-s002.xlsx]

## Sheet: Sheet1
Supplemental Table 2: Nasal samples - average number of reads by Farm and Health Status. (Samples with fewer than 500 reads were excluded.)
NASAL	Healthy	Clinical	Cull	Total
Farm 1	1484	16595.5	1054	8932
Farm 2	NA	NA	3351.5	3352
Farm 3	NA	8042.5	NA	8042.5
Farm 4	9659	3310	1624	4476
Farm 5	1449	775	3470	1898
Farm 6	1936.5	2003	3187	2266
Total	3293	7334	2673
All nasal samples:	Mean Reads ± SD: 4799 ± 6175 Median Reads: 2414
