# Supplementary material for: A cross-sectional study of the nasal and fecal microbiota of sows from different health status within six commercial swine farms
Source: PeerJ. 2021 Sep 17;9:e12120. doi: 10.7717/peerj.12120 (PMC8451438; doi:10.7717/peerj.12120)
Supplement: Supplemental Information 3 [file peerj-09-12120-s003.xlsx]

## Sheet: Sheet1
Supplemental Table 3: Fecal samples - Average number of reads by Farm and Health Status. (Samples with fewer than 66 reads were excluded.)
FECAL	Healthy	Clinical	Cull	Total
Farm 1	31086.5	25738	19946	25590.2
Farm 2	24150	28871.5	14556.5	22526
Farm 3	17133	19861	19248	18747.3
Farm 4	24456	13273.5	27832	21853.8
Farm 5	21944.5	21520.5	25256	22907
Farm 6	35088.5	55564	25194.5	38615.7
Total	25643.1	27471.4	22005.5
All fecal samples:	Mean Reads ± SD: 25,040 ± 12,019 Median Reads: 22,257
