# Supplementary material for: A cross-sectional study of the nasal and fecal microbiota of sows from different health status within six commercial swine farms
Source: PeerJ. 2021 Sep 17;9:e12120. doi: 10.7717/peerj.12120 (PMC8451438; doi:10.7717/peerj.12120)
Supplement: Supplemental Information 4 [file peerj-09-12120-s004.xlsx]

## Sheet: Sheet1
Supplemental Table 4: Microbial community analysis of nasal samples with and without rarefaction at 500 reads and 1000 reads. Microbial community analysis of fecal samples with and without rarefaction at 5600 reads.
		Nasal Microbiota				Fecal Microbiota
	Metric	No rarefaction, removed samples with <500 reads	Data rarefied at 500 reads, removed samples with <500 reads	No rarefaction, removed samples with <1000 reads	Data rarefied at 1000 reads, removed samples with <1000 reads	No rarefaction, removed samples with <5600 reads	Data rarefied at 5600 reads, removed samples with <5600 reads
Alpha Diversity	Shannon Diversity Index Kruskal-Wallis	Nasal vs. Fecal p = 1.42 x 10-9+C5:F13	Nasal vs. Fecal p = 1.42 x 10-9	Nasal vs. Fecal p = 2.76 x 10-9	Nasal vs. Fecal p = 2.76 x 10-9	NA	NA
	Shannon Diversity Index Kruskal-Wallis	By Farm p = 0.635	By Farm p= 0.488	By Farm p = 0.856	By Farm p = 0.743	By Farm p = 0.149	By Farm p = 0.136
	Shannon Diversity Index Kruskal-Wallis	By Health Status p = 0.603	By Health Status p = 0.397	By Health Status p = 0.295	By Health Status p = 0.178	By Health Status p = 0.437	By Health Status p = 0.416
	Faith's PD Kruskal-Wallis	Nasal vs. Fecal p = 0.00009	Nasal vs. Fecal p = 0.00003	Nasal vs. Fecal p = 0.0002	Nasal vs. Fecal p = 0.0002	NA	NA
	Faith's PD Kruskal-Wallis	By Farm p = 0.903	By Farm p= 0.319	By Farm p = 0.441	By Farm p = 0.233	By Farm p = 0.03 No pairwise comparisons were significant	By Farm p = 0.043 No pairwise comparisons were significant
	Faith's PD Kruskal-Wallis	By Health Status p = 0.722	By Health Status p = 0.249	By Health Status p = 0.751	By Health Status p = 0.477	By Health Status p = 0.438	By Health Status p = 0.55
Beta Diversity	Bray Curtis PERMANOVA	By Farm Overall pseudo-F = 1.483, p = 0.028 No pairwise comparisons were significant	By Farm Overall pseudo-F = 1.83, p = 0.002 No pairwise comparisons were significant.	By Farm Overall pseudo-F = 1.31, p = 0.08 No pairwise comparisons were significant	By Farm Overall pseudo-F = 1.66, p = 0.004 No pairwise comparisons were significant	By Farm Overall pseudo-F = 2.94, p = 0.001 All pairwise comparisons were significant except Farm 4 vs. 5 and Farm 5 vs. 6	By Farm Overall pseudo-F = 3.16, p = 0.001 All pairwise comparisons were significant except Farm 4 vs. 5 and Farm 5 vs. 6
	Bray Curtis PERMANOVA	By Health Status Overall pseudo-F = 1.388, p = 0.106 No pairwise comparisons were significant.	By Health Status Overall pseudo-F = 1.64, p = 0.017 Only cull vs. healthy was significant (p = 0.033)	By Health Status Overall pseudo-F = 1.68, p = 0.036 No pairwise comparisons were significant, but clinical vs. cull trended towards significance	By Health Status Overall pseudo-F = 1.67, p = 0.012 No pairwise comparisons were significant, but clinical vs. cull and cull vs. healthy trended towards significance	By Health Status Overall pseudo-F = 0.927, p = 0.555 No pairwise comparisons were significant	By Health Status Overall pseudo-F = 0.897, p = 0.663 No pairwise comparisons were significant
	Bray Curtis PERMDISP	By Farm Overall pseudo-F = 0.750, p = 0.605	By Farm Overall pseudo-F = 0.577, p = 0.795	By Farm Overall pseudo-F = 0.915, p = 0.645	By Farm Overall pseudo-F = 0.479, p = 0.925	By Farm Overall pseudo-F = 1.88, p = 0.042	By Farm Overall pseudo-F = 2.07, p = 0.024
	Bray Curtis PERMDISP	By Health Status Overall pseudo-F = 0.649, p = 0.484	By Health Status Overall pseudo-F = 2.11, p = 0.148	By Health Status Overall pseudo-F = 0.304, p = 0.679	By Health Status Overall pseudo-F = 1.67, p = 0.184	By Farm Overall pseudo-F = 1.01, p = 0.341	By Farm Overall pseudo-F = 0.811, p = 0.394
Differentially Abundant Taxa	ANCOM	By Farm: Nesterenkonia W = 32 Increased on Farm 6	By Farm: Nesterenkonia W = 32 Increased on Farm 6	By Farm: Nesterenkonia W = 30 Increased on Farm 6	By Farm: Nesterenkonia W = 32 Increased on Farm 6	By Farm: F082 uncultured bacterium (Bacteroidales) W = 140 Increased on Farm(s) 1,4,5,6	By Farm: F082 uncultured bacterium (Bacteroidales) W = 140 Increased on Farm(s) 1,4,5,6
	ANCOM	By Health Status: No differentially abundant taxa	By Health Status: No differentially abundant taxa	By Health Status: No differentially abundant taxa	By Health Status: No differentially abundant taxa	By Health Status: No differentially abundant taxa	By Health Status: No differentially abundant taxa
